# Supplementary material
Source: PubMed Central journal article supplement (PMC4008690)
Supplement: NIHMS566519-supplement-01.pdf [file NIHMS566519-supplement-01.pdf]

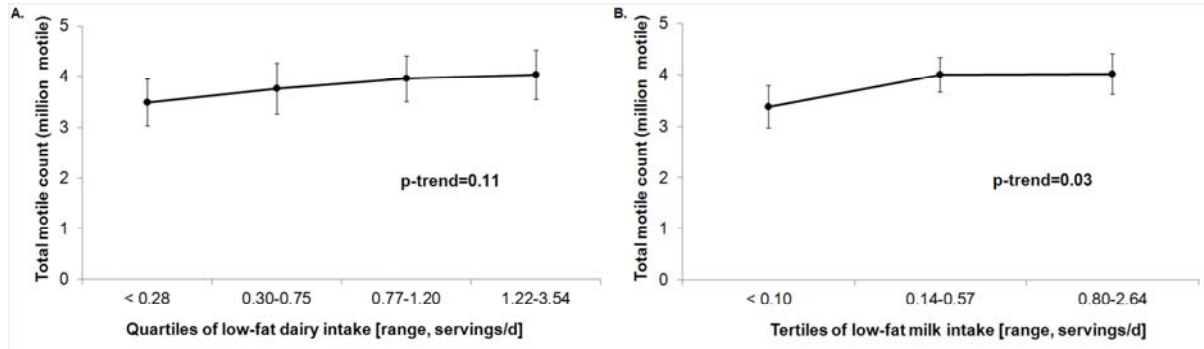

**Supplemental table 1: Adjusted<sup>a</sup> semen quality parameters (mean (95% confidence interval)) according to intake of dairy foods**

|                                              | Original model            | First post-FFQ sample     | Samples collected within 90 days | Men with 1 sample only  | Men with 2 samples only  | Men with 3+ samples      |
|----------------------------------------------|---------------------------|---------------------------|----------------------------------|-------------------------|--------------------------|--------------------------|
| N                                            | 338 samples among 155 men | 155 samples among 155 men | 58 samples among 44 men          | 57 samples among 57 men | 102 samples among 51 men | 179 samples among 47 men |
| <b>Sperm concentration<sup>b</sup></b>       |                           |                           |                                  |                         |                          |                          |
| Low-fat dairy food <sup>c</sup>              | 1.2 (1.1, 1.4)            | 1.2 (1.0, 1.4)            | 1.5 (1.0, 2.2)                   | 1.4 (1.0, 1.9)          | 1.3 (0.9, 1.8)           | 1.2 (0.8, 1.7)           |
| Low-fat milk <sup>d</sup>                    | 1.2 (1.0, 1.4)            | 1.1 (0.9, 1.3)            | 1.4 (0.9, 2.1)                   | 1.2 (0.8, 1.6)          | 1.3 (0.9, 1.8)           | 1.2 (0.8, 1.7)           |
| <b>Sperm progressive motility (% motile)</b> |                           |                           |                                  |                         |                          |                          |
| Low-fat dairy food                           | 3.7 (0.7, 6.7)            | 3.9 (0.3, 7.5)            | 4.9 (-0.1, 9.9)                  | 4.9 (-1.6, 11.5)        | 6.8 (0.7, 13.0)          | -0.1 (-4.5, 4.3)         |
| Low-fat milk                                 | 3.7 (0.3, 7.0)            | 3.7 (-0.3, 7.7)           | 5.5 (0.3, 10.7)                  | 4.9 (-2.3, 12.2)        | 6.2 (-0.8, 13.1)         | 0.2 (-4.0, 4.4)          |

Sensitivity analyses comparing the original model – using all samples per man – to a restricted sample size. Results are in the same direction regardless of how many samples are used or time-related exclusions

<sup>a</sup> Adjusted for age, total energy intake, body mass index, smoking status, abstinence time, previous infertility diagnosis, race, and dietary patterns

<sup>b</sup> Interpreted as fold differences in sperm concentration (million/mL) associated with an increase in 1 serving/day

<sup>c</sup> Includes low fat milk, yogurt, and cottage cheese

<sup>d</sup> Includes skim milk and 1 and 2% milk
